# Supplementary material for: Progressive colloidal clogging mechanism by dendritic build-up in porous media
Source: Royal Society of Chemistry journal article supplement (doi:10.1039/d5sm00285k), 2025-01-01
Supplement: d5sm00285k3.pdf [file d5sm00285k3.pdf]

# Supplementary Materials

## Progressive colloidal clogging mechanism by dendritic build-up in porous media

Walid Okaybi<sup>1\*</sup>, Sophie Roman<sup>1</sup>, Cyprien Soullaine<sup>1</sup>

<sup>1</sup>Institut des Sciences de la Terre d'Orléans, ISTO, UMR 7327, Univ Orléans, CNRS, BRGM, OSUC, F-45071 Orléans, France

\*To whom correspondence should be addressed: [walid.okaybi@cnrs-orleans.fr](mailto:walid.okaybi@cnrs-orleans.fr)

### 1 DLVO interaction potential approximations

We apply DLVO theory to approximate particle-particle and particle-surface interactions. It represents the sum of attractive potentials due to van der Waals forces and repulsion potentials due to the interaction of the electric double layers:

$$V^{DLVO} = V^{VdW} + V^{EDL}.$$

In Equation 1 we present the particle-particle interaction potential for particles of radius  $a_p$  separated by a distance  $h$  (where  $h \ll a_p$ ), as proposed by Schenkel and Kitchener [7]. Additionally, Equation 2 presents the particle-surface interaction potential as described by Hogg et al. [4]:

$$V_{pp}^{DLVO} = -\frac{Aa_p}{12h} + \frac{\epsilon_0\epsilon_r a_p \phi_p^2}{2} (\ln(1 + \exp(-\kappa h))), \quad (1)$$

$$V_{ps}^{DLVO} = -\frac{Aa_p}{6h} \left( \frac{1}{1 + 14h/\lambda} \right) + \frac{\epsilon_0\epsilon_r a_p}{4} (\phi_p^2 + \phi_s^2) \left( \frac{2\phi_p\phi_s}{\phi_p^2 + \phi_s^2} \ln \left( \frac{1 + e^{-\kappa h}}{1 - e^{-\kappa h}} \right) + \ln(1 - \exp(-2\kappa h)) \right), \quad (2)$$

where all the parameters with their corresponding values are defined and listed in Table 1. Additionally, we plot the DLVO potentials for particle-particle and particle-surface interactions as a function of the separation distance (Fig. 1).

### 2 Dendrite clogging at multiple locations within the porous domain

Fig. 2 presents averaged experimental images capturing the progressive formation of a dendritic clog in a specific region of the porous domain at a flow rate of 8  $\mu\text{L}/\text{min}$ , as the number of

Table 1: Parameters and their corresponding values used in the DLVO interaction potential approximations. The annotations p, m, and s refer to the particle, medium, and PDMS surface.

| Fixed parameters                                                                                                                   | Value                                                                   |
|------------------------------------------------------------------------------------------------------------------------------------|-------------------------------------------------------------------------|
| Particle radius, $a_p$                                                                                                             | 2.25 $\mu\text{m}$                                                      |
| Vacuum permittivity, $\varepsilon_0$                                                                                               | $8.85 \times 10^{-12} \text{ C}^2/\text{Jm}$                            |
|                                                                                                                                    | 78.5 for water [1]                                                      |
| Medium dielectric constant, $\varepsilon_r$                                                                                        | 40.2 for glycerol [1]                                                   |
|                                                                                                                                    | 70.1 (weighted average)                                                 |
| Boltzmann constant, $k_B$                                                                                                          | $1.38 \times 10^{-23} \text{ J/K}$                                      |
| Temperature, $T$                                                                                                                   | 293 K                                                                   |
| Avogadro's number, $N_A$                                                                                                           | $6.023 \times 10^{23}$                                                  |
| Electron charge, $e$                                                                                                               | $1.6 \times 10^{-19} \text{ C}$                                         |
|                                                                                                                                    | $A_{polystyrene} = 6.5 \times 10^{-20} \text{ J}$ [3]                   |
|                                                                                                                                    | $A_{PDMS-surface} = 4.4 \times 10^{-20} \text{ J}$ [2]                  |
| Hamaker constant, $A$                                                                                                              | $A_{water} = 3.7 \times 10^{-20} \text{ J}$ [3]                         |
|                                                                                                                                    | $A_{glycerol} = 1.38 \times 10^{-20} \text{ J}$ [5]                     |
| $A_{33} = A_{medium}$                                                                                                              | $3.19 \times 10^{-20} \text{ J}$ (weighted average)                     |
| $A_{131} = (\sqrt{A_{33}} - \sqrt{A_{11}})(\sqrt{A_{33}} - \sqrt{A_{11}})$ [5]                                                     | $2.7 \times 10^{-21} \text{ J}$ for polystyrene-polystyrene interaction |
| $A_{132} = (\sqrt{A_{33}} - \sqrt{A_{11}})(\sqrt{A_{33}} - \sqrt{A_{22}})$ [5]                                                     | $7.3 \times 10^{-21} \text{ J}$ for polystyrene-surface interaction     |
| Retardation length, $\lambda$                                                                                                      | $100 \times 10^{-9} \text{ m}$                                          |
| Solution Ionic strength, $I$                                                                                                       | 100 mM                                                                  |
| Measured particles zeta potential, $\phi_p$                                                                                        | -21.3 mV                                                                |
| PDMS surface zeta potential, $\phi_s$                                                                                              | -23 mV [6]                                                              |
| Reciprocal Debye length, $\kappa = \left( \frac{2 \times 10^3 N_A e^2 I}{\varepsilon_0 \varepsilon_r K_B T} \right)^{\frac{1}{2}}$ | $1.2 \times 10^9 \text{ m}$                                             |

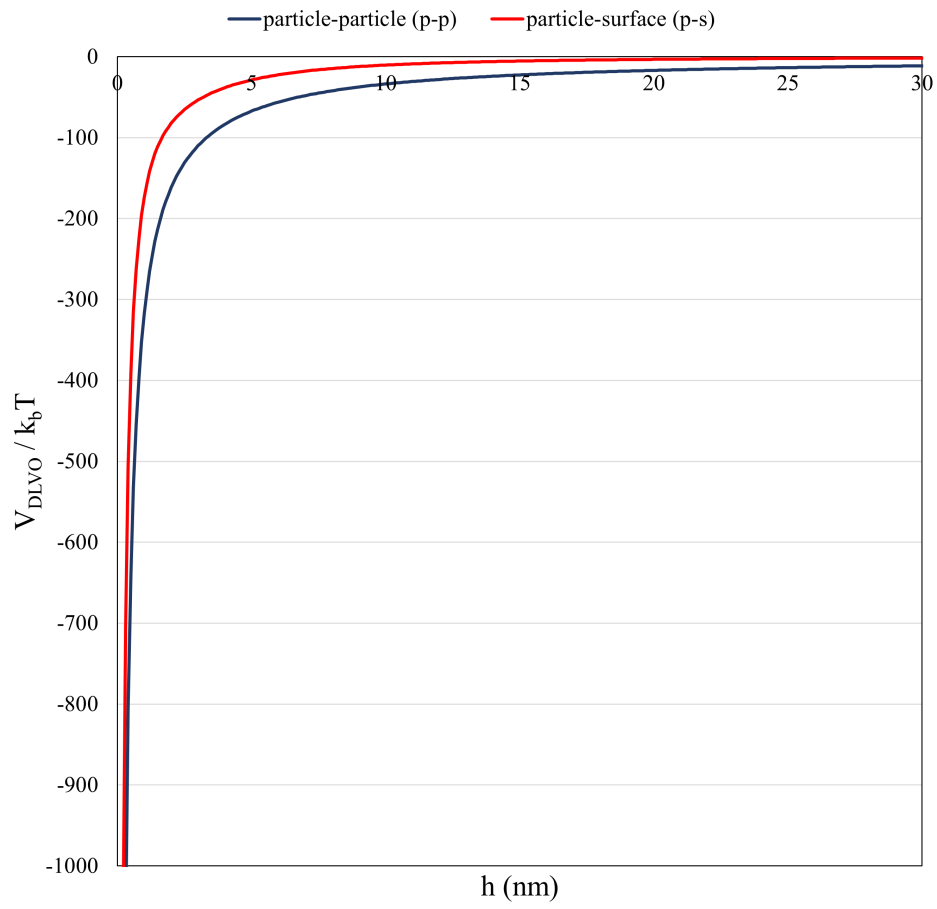

Figure 1: DLVO profiles for particle-particle and particle-surface interactions as a function of separation distance ( $h$ ) in nanometers (nm).

injected pore volumes (PVs) increases, leading to the complete clogging of the local flow pathway. Fig. 3 further illustrates dendritic clogging occurring in two distinct regions: (a) after 2370 PVs and (b) after 2261 PVs, emphasizing the variability in dendrite-clogging dynamics within the porous domain.

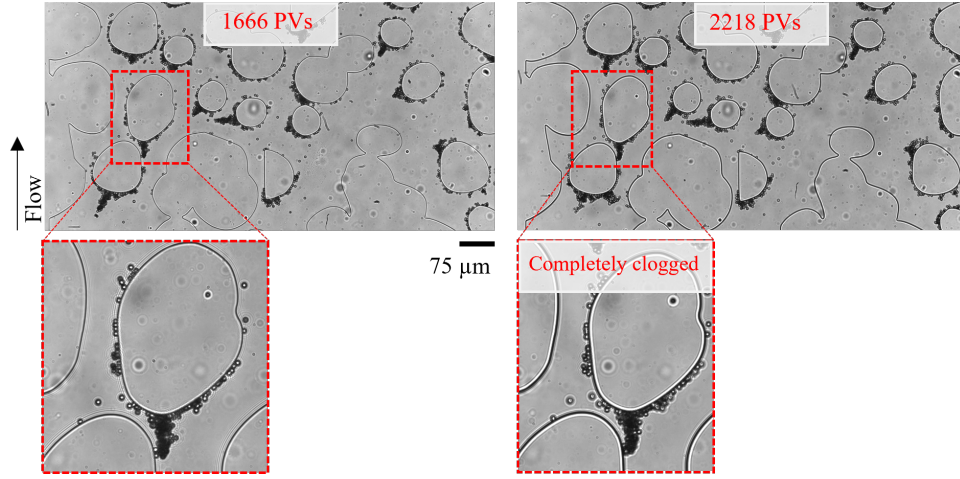

Figure 2: Averaged experimental images at a flow rate of 8  $\mu\text{L}/\text{min}$ , showing the progressive formation of a dendritic clog in a specific region of the porous domain over successive pore volumes of particle injection (PVs).

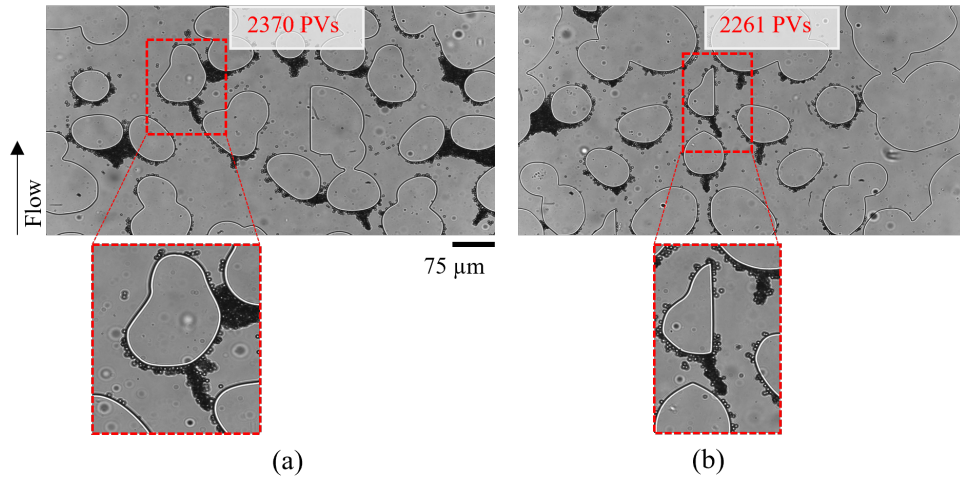

Figure 3: Averaged experimental images at a flow rate of 8  $\mu\text{L}/\text{min}$ , illustrating dendritic clogging in two distinct regions of the porous domain: (a) after 2370 pore volumes (PVs) of particle injection and (b) after 2261 PVs.

### 3 Movies of the experiments

The movies were recorded using a FASTEC camera at 271 fps and are presented at a playback speed of 10 frames per second:

- Movie corresponding to Figure 3(a) in the main manuscript after 1664 PVs injected: Movie\_Figure\_3a\_8uL\_min\_1664\_PVs.

- Movie corresponding to Figure 3(a) in the main manuscript after 2225 PVs injected:  
Movie\_Figure\_3a-8uL\_min\_2225\_PVs.

## References

- [1] Gosta Akerlof. Dielectric constants of some organic solvent-water mixtures at various temperatures. *Journal of the American Chemical Society*, 54(11):4125–4139, 1932.
- [2] Calum J Drummond and Derek YC Chan. van der waals interaction, surface free energies, and contact angles: dispersive polymers and liquids. *Langmuir*, 13(14):3890–3895, 1997.
- [3] Yong-Kuan Gong, Kenichi Nakashima, and Renliang Xu. A novel method to determine effective charge of polystyrene latex particles in aqueous dispersion. *Langmuir*, 17(9): 2889–2892, 2001.
- [4] RTWDW Hogg, To Wo Healy, and Douglas W Fuerstenau. Mutual coagulation of colloidal dispersions. *Transactions of the Faraday society*, 62:1638–1651, 1966.
- [5] Jacob N Israelachvili. *Intermolecular and surface forces*. Academic press, 2011.
- [6] B Mustin and B Stoeber. Single layer deposition of polystyrene particles onto planar polydimethylsiloxane substrates. *Langmuir*, 32(1):88–101, 2016.
- [7] JH Schenkel and JA Kitchener. A test of the derjaguin-verwey-overbeek theory with a colloidal suspension. *Transactions of the Faraday Society*, 56:161–173, 1960.
